# Supplementary material for: Robust fluorite-structured high-entropy oxides with integrated multi-active site construction for catalytic cathodes of Li–CO 2 batteries
Source: Royal Society of Chemistry journal article supplement (doi:10.1039/d4qi02985b), 2025-01-01
Supplement: d4qi02985b1.pdf [file d4qi02985b1.pdf]

## Electronic Supplementary Information

### **Robust fluorite-structured high-entropy oxides with integrated multi-active site construction for Li-CO<sub>2</sub> batteries catalytic cathodes**

Qinghua Deng,<sup>\*a</sup> Dan Chen,<sup>a</sup> Shi Zhang,<sup>a</sup> Yuan Chen,<sup>a</sup> Hanbo Zeng,<sup>a</sup> Xuguang Li,<sup>a</sup> Sike Zhang<sup>a</sup> and Tianyu Wang<sup>\*b</sup>

<sup>a</sup> School of Material Engineering, Wuhu Institute of Technology, Wuhu, 241002, P. R. China

<sup>b</sup> Key Laboratory of Environmental Remediation and Ecological Health, Ministry of Industry and Information Technology, School of Environmental and Biological Engineering, Nanjing University of Science and Technology, Nanjing, 210094, P. R. China;

*\*Corresponding authors.*

E-mails addresses: 101458@whit.edu.cn (Q. Deng); wangtianyu@njust.edu.cn (T. Wang)

## 1. Materials characterization

**1.1 Materials and Reagents.** All the reagents were analytic grade and used as purchased without further purification. Cerium acetate ( $(\text{CH}_3\text{CO}_2)_3\text{Ce}\cdot x\text{H}_2\text{O}$ ), iron chloride hexahydrate ( $\text{FeCl}_3\cdot 6\text{H}_2\text{O}$ ), nickel acetate tetrahydrate ( $\text{NiC}_4\text{H}_6\text{O}_4\cdot 4\text{H}_2\text{O}$ ), Cobalt (II) acetate tetrahydrate ( $\text{C}_4\text{H}_6\text{CoO}_4\cdot 4\text{H}_2\text{O}$ ), manganese acetate tetrahydrate ( $\text{MnC}_4\text{H}_6\text{O}_4\cdot 4\text{H}_2\text{O}$ ), 1,3,5-Benzenetricarboxylic acid (BTC), cetyltrimethylammonium bromide (CTAB),  $\text{LiCF}_3\text{SO}_3$ , tetraethylene glycol dimethyl ether (TEDGME), N-Methylpyrrolidone (NMP), methanol and imidazole were bought from Macklin Biochemical Co., Ltd. Ultrapure water was used in all experiments.

**1.2 Material preparation.** The target samples were prepared by a facile MOFs precursor method. Specifically, 1 mmol of  $(\text{CH}_3\text{CO}_2)_3\text{Ce}\cdot x\text{H}_2\text{O}$  and 0.25 mmol of  $\text{FeCl}_3\cdot 6\text{H}_2\text{O}$ ,  $\text{NiC}_4\text{H}_6\text{O}_4\cdot 4\text{H}_2\text{O}$ ,  $\text{C}_4\text{H}_6\text{CoO}_4\cdot 4\text{H}_2\text{O}$  and  $\text{MnC}_4\text{H}_6\text{O}_4\cdot 4\text{H}_2\text{O}$  were first dissolved in 50 mL of water to form solution A. Subsequently, 30 mg of CTAB and 2.5 mmol of BTC were dissolved in 50 mL of water to form solution B. The solution A was added drop by drop to B under stirring at room temperature for 1.5 h. Then, the samples were centrifuged and washed with water and ethanol to remove impurities. The prepared precursor was soaked in methanol overnight and then dried in a vacuum drying oven. The dried precursor was ball-milling for 24 h and heated up to  $500^\circ\text{C}$  at a rate of  $1^\circ\text{C}/\text{min}$  and kept for 2 h. After natural cooling, the target product fluorite-type high entropy oxides  $(\text{CeFeCoNiMn})\text{O}_x$  (labeled as HEOs) was obtained. As comparison,  $\text{CeO}_2$  and  $(\text{FeCoNiMn})\text{O}_x$  (labeled as TOs) were obtained by leaving out the addition of Ce source or by leaving out the addition of Fe/Co/Ni/Mn species and by going through the same preparative process.

**1.3 Materials Characterization.** The physical structure of the samples was examined using X-ray diffraction (XRD) patterns generated by Cu  $K\alpha$  radiation ( $\lambda = 1.541 \text{ \AA}$ ) on a Bruker D8 diffractometer. Raman spectra were acquired within the range of 0 to  $800 \text{ cm}^{-1}$  using a LabRAM HR spectrometer. To analyze the surface electronic states, X-ray photoelectron spectroscopy (XPS) measurements were conducted on a Thermo Scientific ESCALAB 250Xi instrument, employing C 1s (284.8 eV) for calibration. Morphological and surface visualizations were enhanced through the use

of transmission electron microscopy (TEM) and high-resolution TEM (HRTEM) on a JEM-2010 system. Fourier Transform Infrared (FTIR) spectra were recorded using a NEXUS 470 spectrophotometer with a KBr base. Additionally, nitrogen adsorption/desorption isotherms were determined using an ASAP 2460 analyzer for specific surface area and porosity assessments.

**1.4 Li-CO<sub>2</sub> batteries assembly.** Preparation of cathode sheets is essential for Li-CO<sub>2</sub> batteries prior to assembly. Initially, a catalyst ink was formulated by mixing the active material, binder (PVP), and conductive agent (Super P) in NMP solvent at a 8:1:1 mass ratio. This ink was then coated onto carbon paper and dried at 60°C. Subsequently, the coated paper was cut into 14 mm diameter discs to form the catalytic cathodes, with an active material mass density of approximately 0.35 mg cm<sup>-2</sup> on the paper. A CR2032 cell was assembled for the Li-CO<sub>2</sub> battery, featuring a cathode side with a hole, a 16 mm diameter lithium metal anode, an 18 mm diameter glass fiber separator, and 70 μL of 1M LiCF<sub>3</sub>SO<sub>3</sub> in TEGDME as the electrolyte. Post-assembly, the cells were placed in a sealed box filled with CO<sub>2</sub> and allowed to equilibrate at 25°C for 12 hours. Battery testing was conducted using a LAND CT 3001A tester in either voltage-limit mode (ranging from 2.0 to 4.5 V at 100 mA g<sup>-1</sup>) or capacity-limit mode (1000 mA h g<sup>-1</sup> at 100 mA g<sup>-1</sup>). The measurements account for current density and specific capacity based on the active material's quantity. Additionally, electrochemical impedance spectroscopy (EIS) was performed over a frequency range of 1 MHz to 1 mHz with a 5 mV amplitude, and cyclic voltammetry (CV) is conducted within 2.0 to 4.5 V at a scan rate of 0.1 mV s<sup>-1</sup>, both using a CHI 760E workstation.

**Table S1.** The ICP-MS measurement results of the synthesized CeFeCoNiMnO<sub>x</sub>.

| <b>sample</b>          | <b>CeFeCoNiMnO<sub>x</sub></b> |
|------------------------|--------------------------------|
| <b>Ce / mass ratio</b> | 56.2%                          |
| <b>Fe / mass ratio</b> | 5.1%                           |
| <b>Co / mass ratio</b> | 4.8%                           |
| <b>Ni / mass ratio</b> | 5.0%                           |
| <b>Mn / mass ratio</b> | 4.5%                           |

Based on the calculation of the results of the ICP-MS test it can be measured that the atomic ratios of Ce, Fe, Co, Ni, Mn, and O in the CeFeCoNiMnO<sub>x</sub> samples are 17.7%, 4.0%, 3.6%, 3.8%, 3.6%, and 67.4%, respectively.

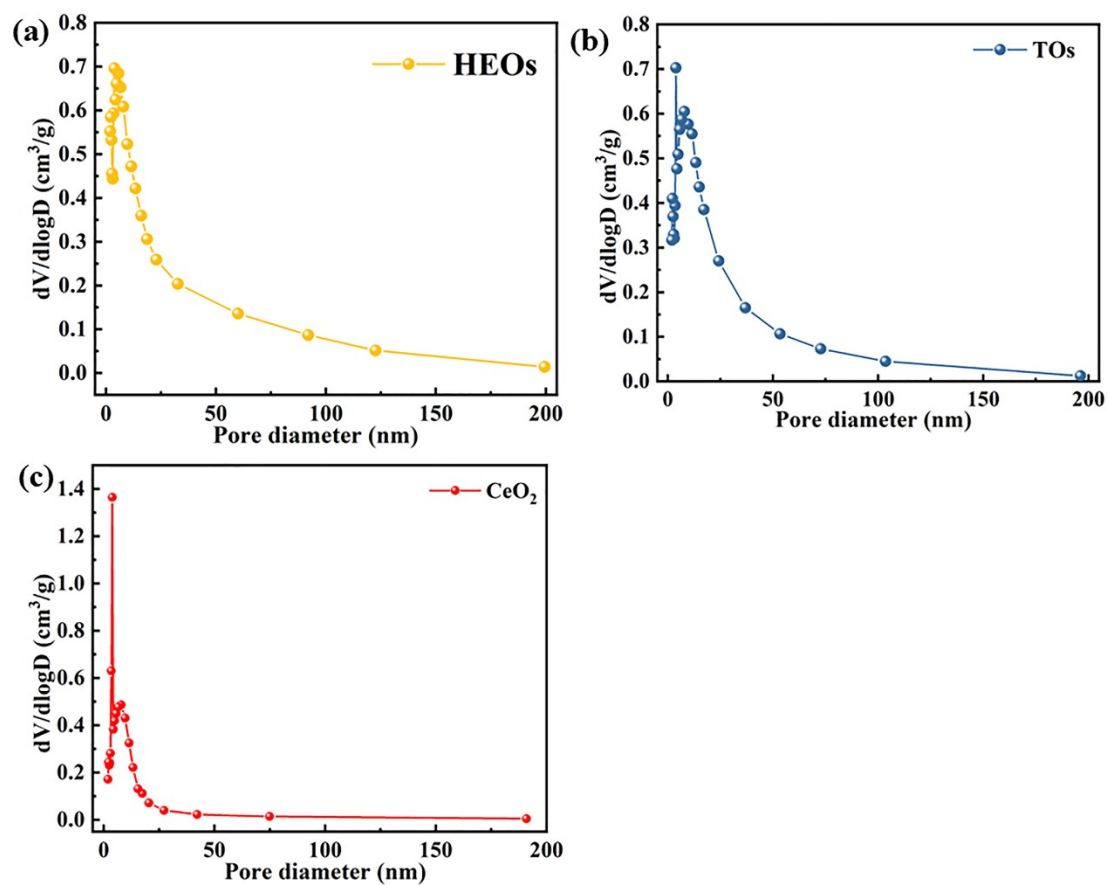

**Fig. S1.** (a-c) Pore size distribution of prepared samples.

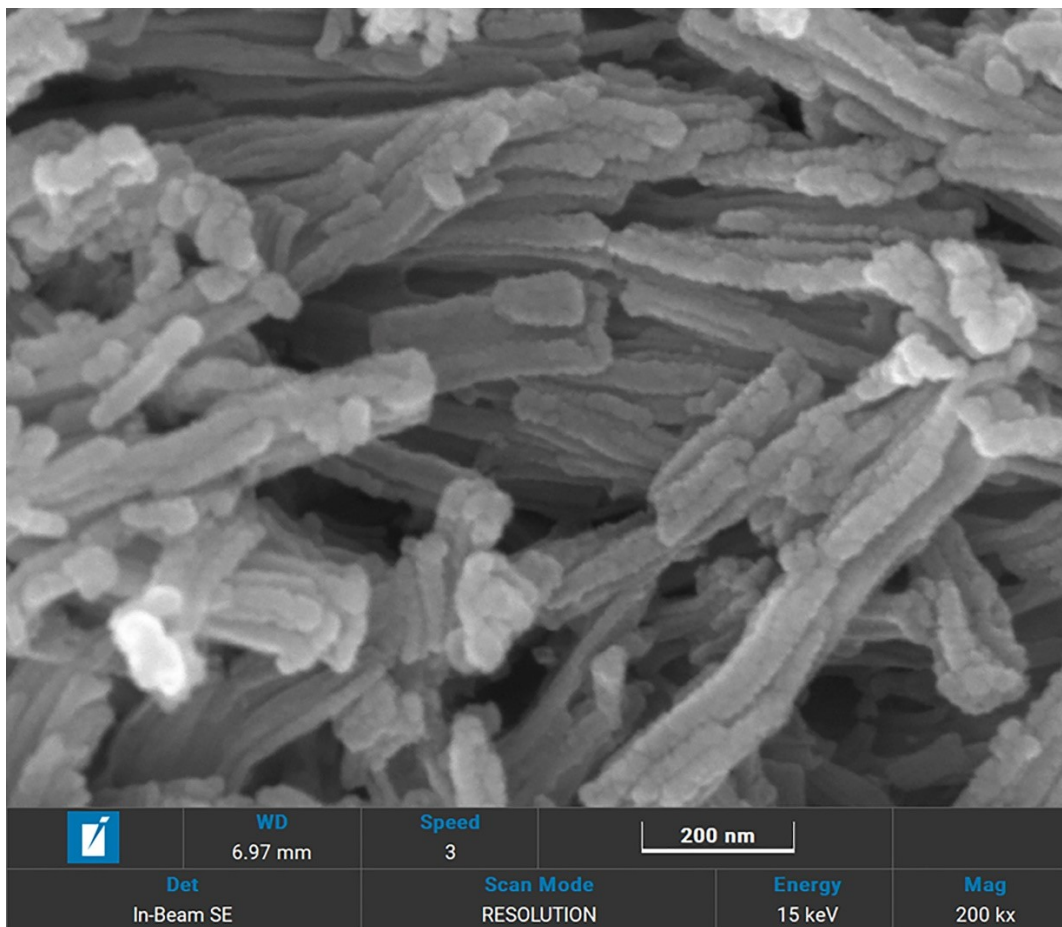

**Fig. S2.** SEM image of HEOs.

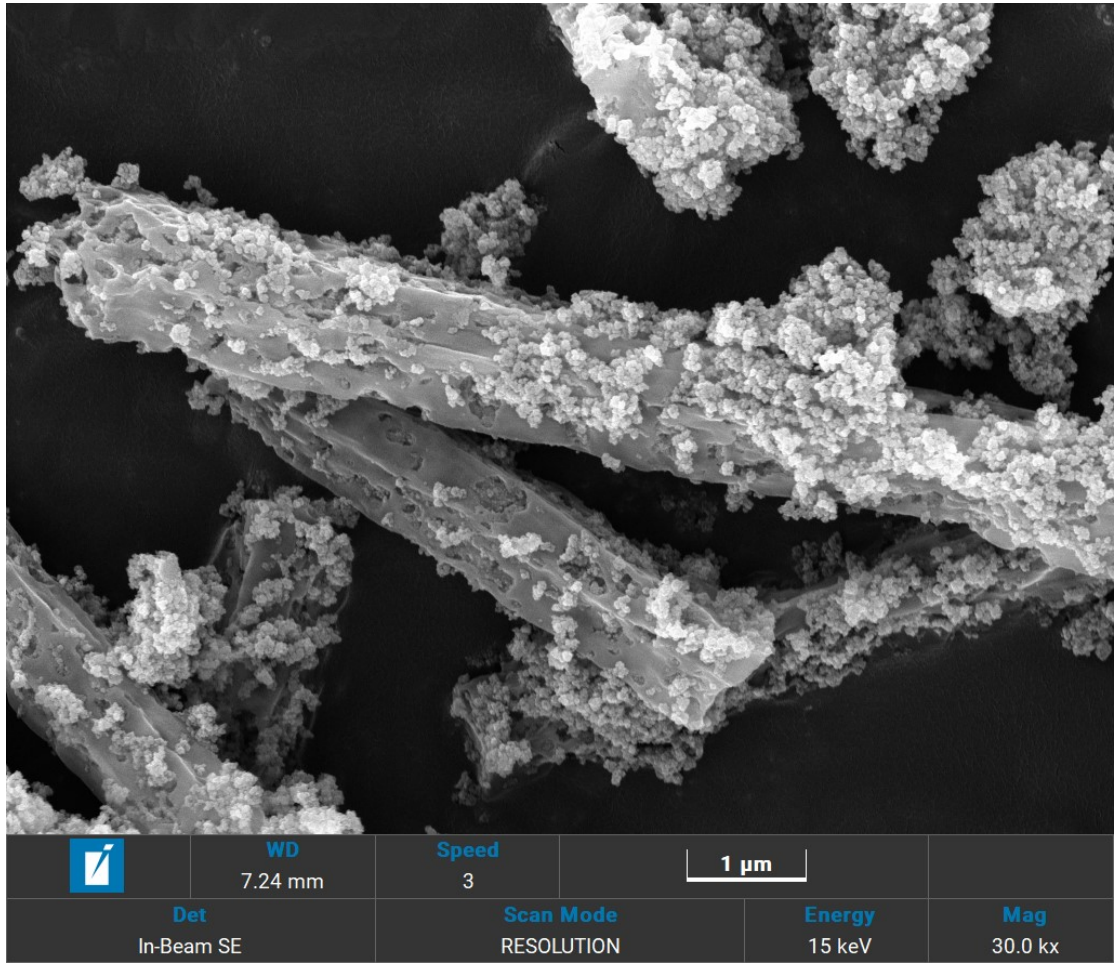

**Fig. S3.** SEM image of TOs.

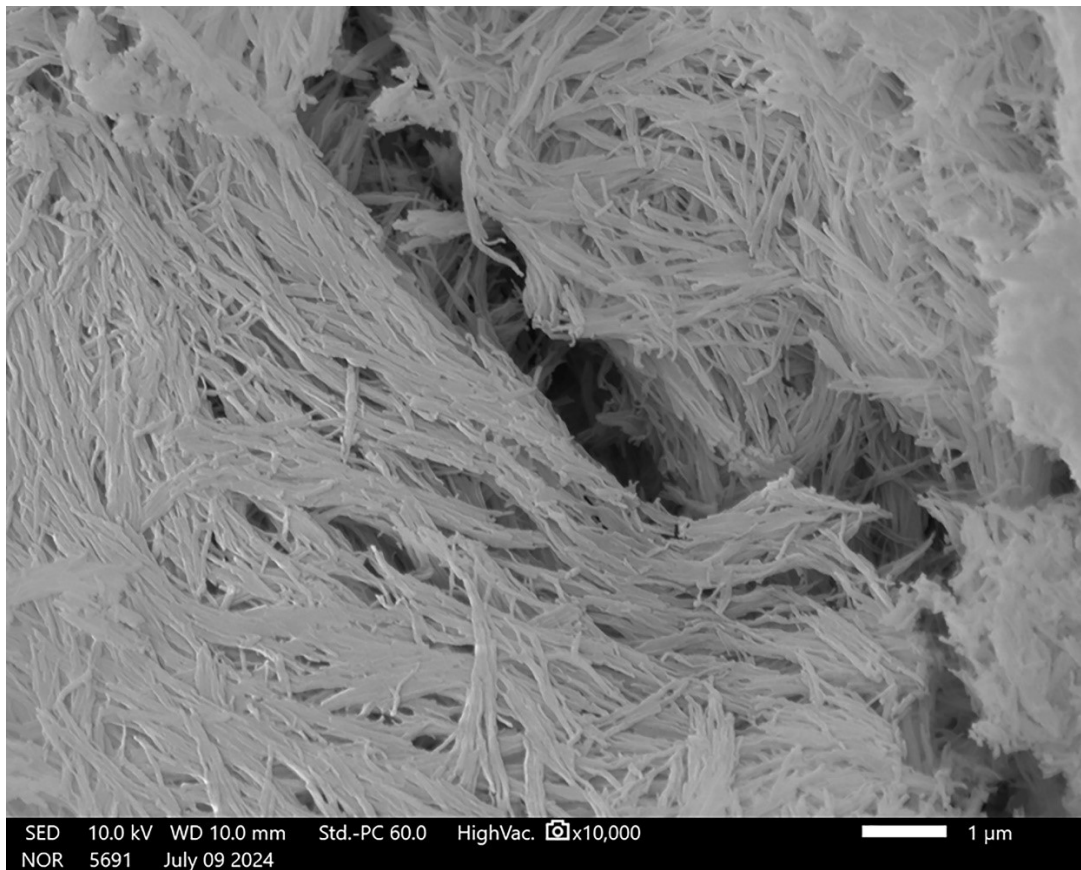

**Fig. S4.** SEM image of CeO<sub>2</sub>.



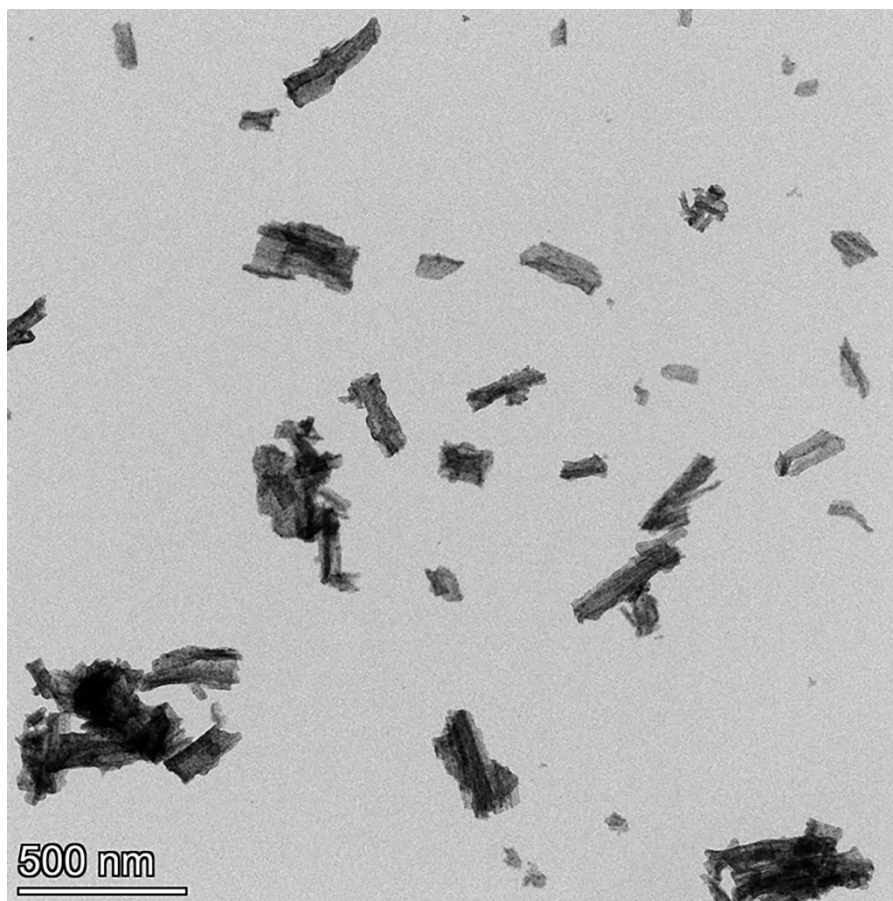

**Fig. S5.** TEM image of HEOs.

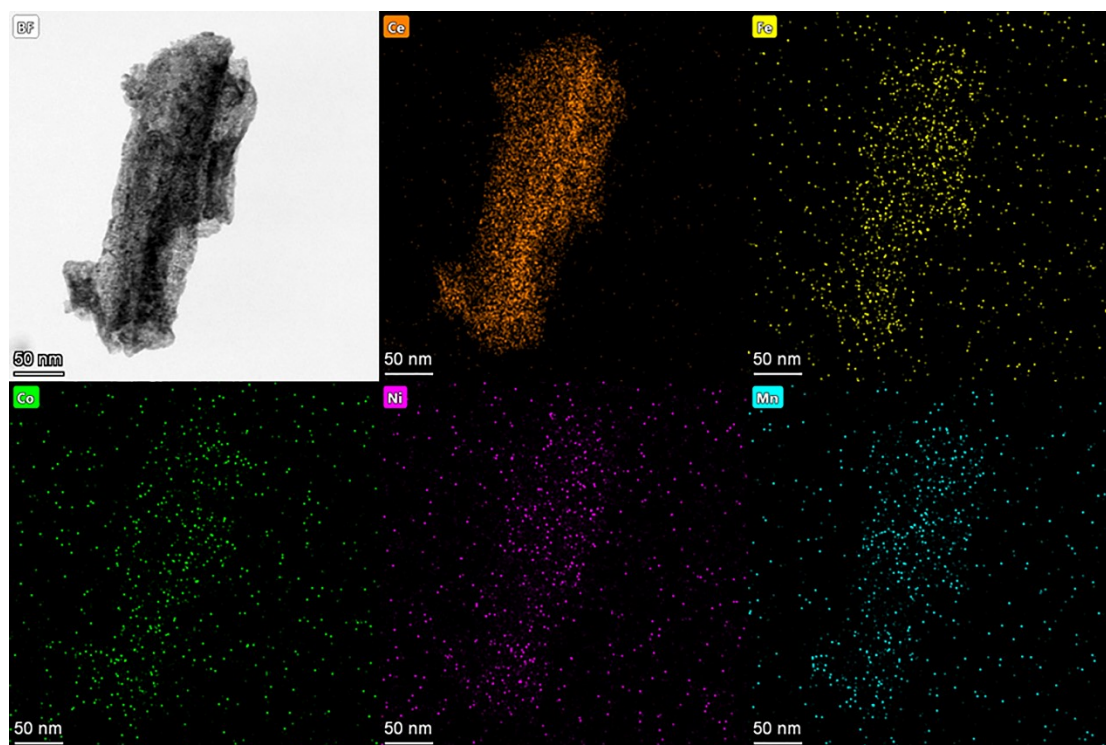

**Fig. S6.** The TEM image and EDS mapping of the corresponding element in HEOs.

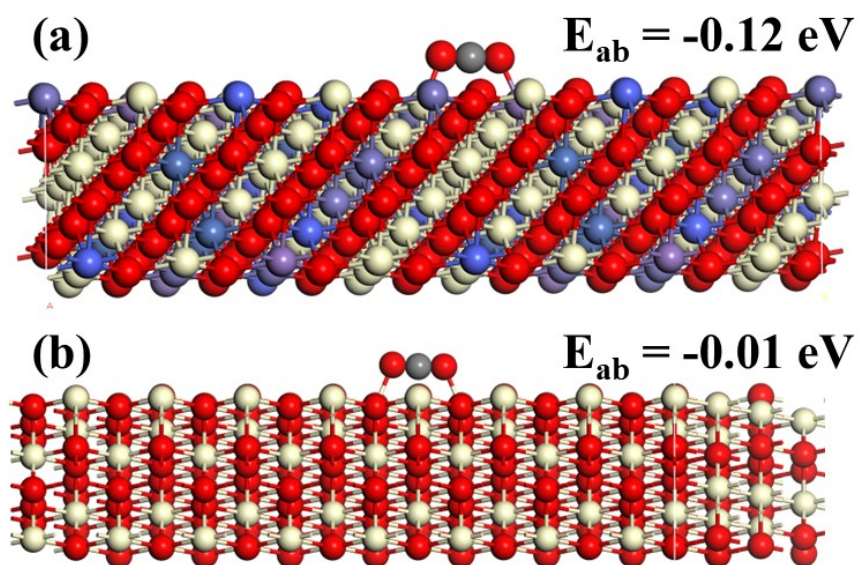

**Fig. S7.** The adsorption model diagram of each component in the catalytic cathode for  $\text{CO}_2$  molecule. (a)  $\text{CO}_2$  molecules adsorbed on  $\text{CeFeCoNiMnO}_x$ . (b)  $\text{CO}_2$  molecules adsorbed on  $\text{CeO}_2$ .

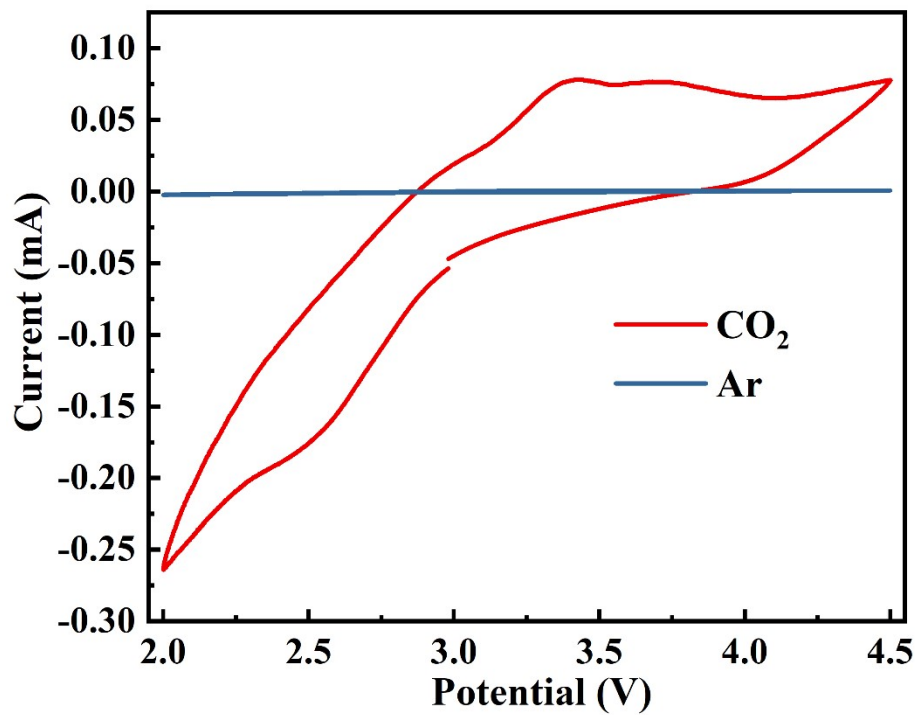

Fig. S8. Cyclic voltammety for HEOs based Li-CO<sub>2</sub> batteries at different atmosphere.
